# Supplementary material
Source: publisher figshare collection journal article supplement (https://karger.figshare.com/ndownloader/files/14859962)
Supplement: Supplementary file 1 [file 14859962]

**Fig. S1.** Purification by immune-affinity by an antibody C9-C1 reactive to Art ar 2 allergen identified by mass spectrometry and peptide matching.

**a** SDS-PAGE of purified protein by C9-C1 mAb affinity from extract of *A. arygi*; **b** mass spectrometry of trypsin digested peptides matched to Art v 2 allergen. **c** amino acid sequence of Art ar 2 and peptides matched to observed masses in **b**.
